# Supplementary material for: Exogenous Penicillium camemberti Lipase Preparation Exerts Prebiotic-like Effects by Increasing Cecal Bifidobacterium and Lactobacillus Abundance in Rats
Source: MDPI journal article supplement (doi:10.3390/fermentation9030227), 2023-02-27
Supplement: s1 [file s1]

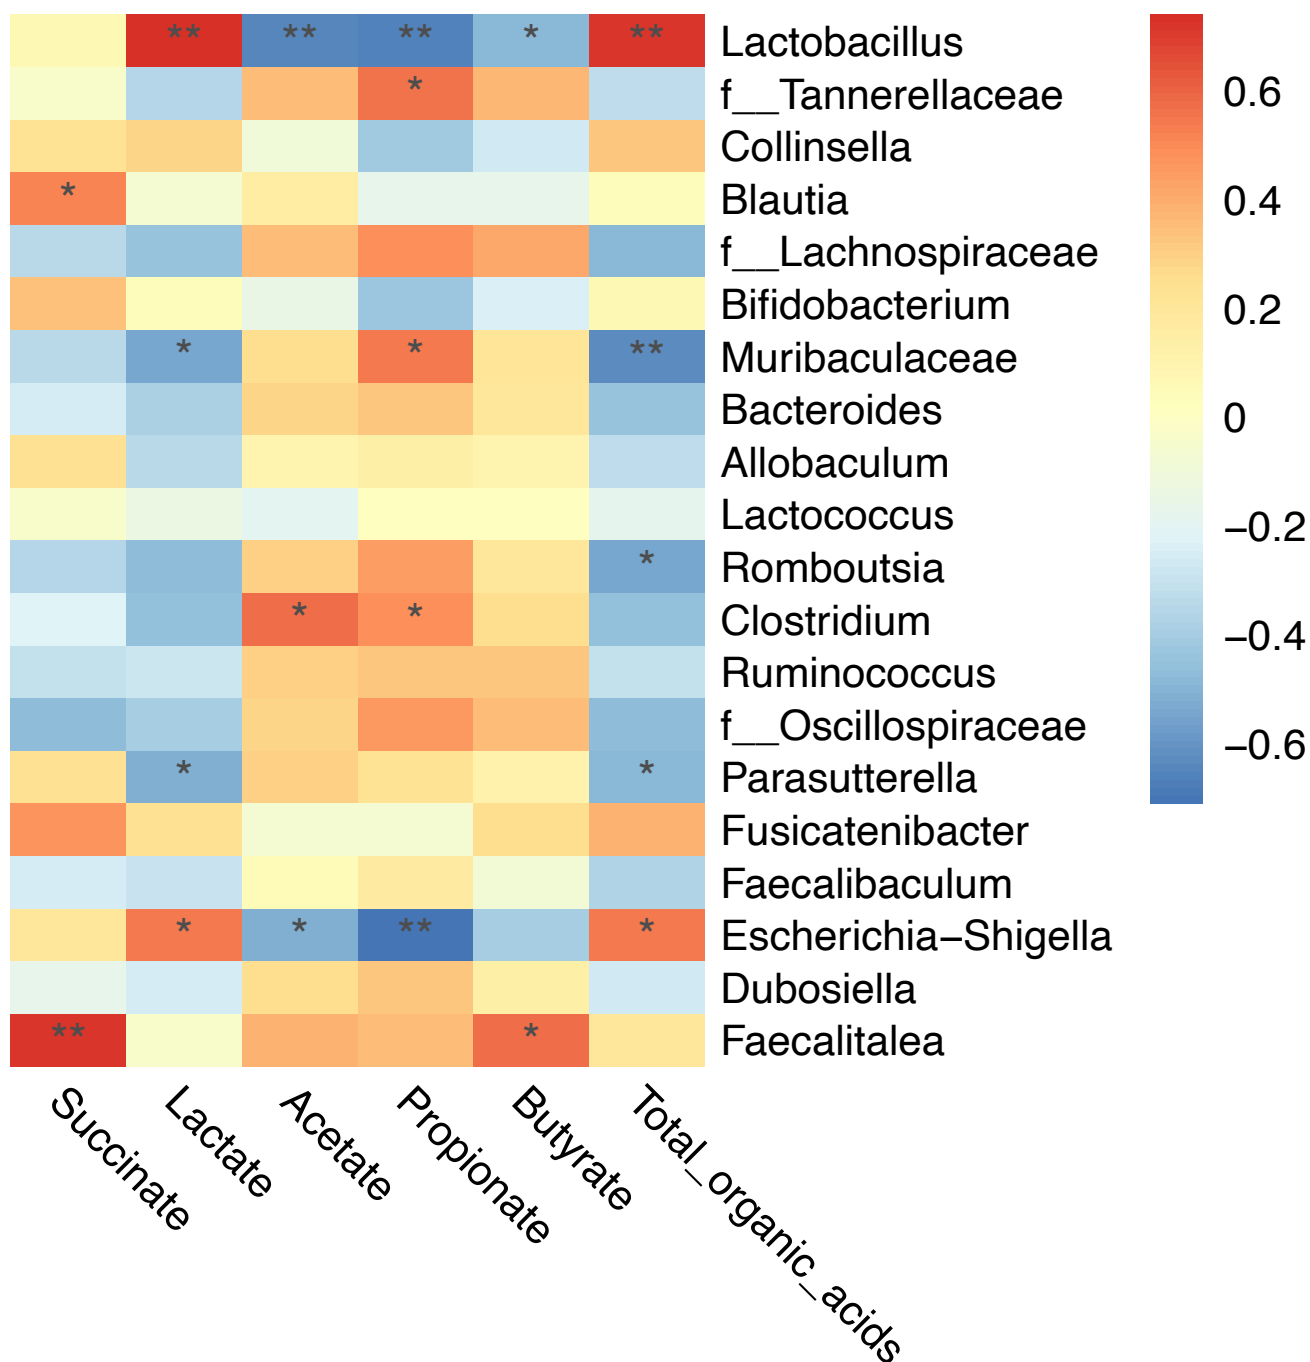

**Supplemental Figure S1.** Correlation matrix (correlation coefficient,  $r$ ) between cecal levels of organic acids and microbiota composition. The deep color bars indicate correlation strength. \*  $p < 0.05$ , \*\*  $p < 0.01$ .
